# Supplementary material for: The morphology of the inner ear of squamate reptiles and its bearing on the origin of snakes
Source: R Soc Open Sci. 2017 Aug 23;4(8):170685. doi: 10.1098/rsos.170685 (PMC5579127; doi:10.1098/rsos.170685)
Supplement: Supplementary material S1 - Table S1 [file rsos170685supp1.xlsx]

## Sheet: Sheet1
SPECIES	Taxonomic authority	Specimen number	Notes
Acanthophis antarcticus	(Shaw & Nodder, 1802)	SAMA R1520
Acontias meleagris	(Linnaeus, 1758)	NMV 56739
Acrochordus arafurae	McDowell, 1979	SAMA R4305
Acutotyphlops subocularis	(Waite, 1897)	SAMA R64770
Ahaetulla prasina	(Boie, 1824)	SAMA R22443
Aipysurus fuscus	(Tschudi, 1837)	WAM R129814
Anguis fragilis	Linnaeus, 1758	SAMA 1625
Anilios bicolor	(Peters, 1858)	SAMA 60626
Anilius scytale	(Linnaeus, 1758)	SAMA R36774
Anniella pulchra	Gray, 1852	SAMA R40133
Anomochilus leonardi	Smith, 1940	FRIM 0026	from www.digimorph.org (Deep Scaley Project), courtesy of Jessie Maisano and Olivier Rieppel
Aprasia inaurita	Kluge, 1974	SAMA R64535
Aspidites ramsayi	(Macleay, 1882)	SAMA R49367
Bipes biporus	(Cope, 1894)	CAS 126478	from www.digimorph.org (Deep Scaley Project), courtesy of Jessie Maisano and Olivier Rieppel
Boiga irregularis	(Bechstein, 1802)	SAMA R6705
Brachyurophis australis	(Krefft, 1864)	SAMA R131571
Calabaria reinhardtii	(Schlegel, 1851)	FMNH 117833	from www.digimorph.org (Deep Scaley Project), courtesy of Jessie Maisano and Olivier Rieppel
Calliophis maculiceps	(Günther, 1858)	SAMA R36828
Candoia carinata	(Schneider, 1801)	SAMA R5267D
Causus rhombeatus	(Lichtenstein, 1823)	SAMA R36772
Cerberus rynchops	(Schneider, 1799)	SAMA R22427
Chrysopelea paradisi	Boie, 1827	SAMA R36780
Corucia zebrata	Gray, 1856	SAMA R35765
Ctenophorus decresii	(Duméril & Bibron, 1837)	SAMA R28618
Ctenotus spaldingi	(Macleay, 1877)	SAMA R58825
Cylindrophis ruffus	(Laurenti, 1768)	SAMA R12956
Dendrelaphis calligastra	(Günther, 1867)	SAMA R2348
Dibamus novaguineae	Duméril & Bibron, 1839	SAMA R8852
Dinilysia patagonica	Woodward, 1901	MACN RN 1014	from www.morphobank.org (project 2170), previously published in Yi & Norell (2015).
Dipsas pavonina	Schlegel, 1837	SAMA R36852
Draco walkeri	Boulenger, 1891	SAMA R40628
Echiopsis curtus	Schlegel, 1837	SAMA R28037
Emydocephalus annulatus	Krefft, 1869	WAM R47852
Enhydris polylepis	(Fischer, 1886)	SAMA R4910	Pseudoferania
Ephalophis greyi	Smith, 1931	SAMA R35077
Erpeton tentaculatum	Lacépède, 1800	SAMA R22571
Eryx colubrinus	(Linnaeus, 1758)	FMNH 63117	from www.digimorph.org (Deep Scaley Project), courtesy of Jessie Maisano and Olivier Rieppel
Eunectes murinus	(Linnaeus, 1758)	SAMA R69321
Fordonia leucobalia	(Schlegel, 1837)	SAMA R11428
Heloderma suspectum	Cope, 1869a	SAMA R55982
Hemiaspis signata	(Jan, 1859)	SAMA R2264
Homoroselaps lacteus	(Linnaeus, 1758)	SAMA R47677
Hoplocephalus bitorquatus	(Jan, 1859)	SAMA R54537
Hydrelaps darwinensis	Boulenger, 1896	WAM R22346
Hydrophis platurus	(Linnaeus, 1766)	FMNH 16927	Pelamis
Intellagama lesueurii	(Gray, 1831)	SAMA R27066
Latastia longicaudata	(Reuss, 1834)	SAMA R66830
Laticauda colubrina	(Schneider, 1799)	SAMA R48012
Leptophis ahaetulla	(Linnaeus, 1758)	SAMA R36844
Lerista timida	(Fischer, 1881)	SAMA 68426
Liotyphlops beui	(Amaral, 1924)	SAMA R40142
Loxocemus bicolor	Cope, 1861	FMNH 104800	from www.digimorph.org (Deep Scaley Project), courtesy of Jessie Maisano and Olivier Rieppel
Lycodon aulicus	(Linnaeus, 1758)	SAMA R36823
Morelia viridis	(Schlegel, 1872)	SAMA R4803
Myron richardsoni	Gray, 1849	SAMA R24824
Naja siamensis	Laurenti, 1768	SAMA R63784
Natrix natrix	(Linnaeus, 1758)	SAMA R36836
Notechis scutatus	(Peters, 1861)	SAMA R29514
Oligodon taeniatus	(Günther, 1861)	SAMA R36806
Oxybelis aeneus	(Wagler, 1824)	SAMA R36847
Pantherophis guttatus	(Linnaeus, 1766)	SAMA R481	Elaphe
Parahydrophis mertoni	(Roux, 1910)	NTM R458
Pareas margaritophorus	(Jan, 1866)	SAMA R64312
Platecarpus sp.	Cope, 1869b	AMNH FM 1645	from www.morphobank.org (project 2170), previously published in Yi & Norell (2015).
Psammodynastes pulverulentus	(Boie, 1827)	SAMA R not registered
Pseudonaja mengdeni	Wells & Wellington, 1985	SAMA R65496
Pygopus schraderi	Boulenger, 1913	SAMA R65807
Python molurus	(Linnaeus, 1758)	THNC not registered	from www.digimorph.org (Deep Scaley Project), courtesy of Jessie Maisano and Olivier Rieppel
Shinisaurus crocodilurus	Ahl, 1930	SAMA R66666
Simoselaps bertholdi	(Jan, 1859)	SAMA R61747
Suta suta	(Peters, 1863)	SAMA R20543
Teretrurus sanguineus	(Beddome, 1867)	NMV 8385
Thecadactylus rapicauda	(Houttuyn, 1782)	SAMA R40100
Tiliqua adelaidensis	(Peters, 1863)	SAMA R68381
Toxicocalamus loriae	(Boulenger, 1897)	SAMA R6275
Trilepida dimidiatum	(Jan, 1861)	SAMA R40143
Trimeresurus purpureomaculatus	(Gray, 1832)	SAMA R22572
Tropidophis haetianus	(Cope, 1879)	THNC not registered	from www.digimorph.org (Deep Scaley Project), courtesy of Jessie Maisano and Olivier Rieppel
Varanus gilleni	Lucas & Frost, 1895	SAMA R32164
Vermicella annulata	(Gray, 1841)	SAMA R50226
Xenopeltis unicolor	Reinwardt, 1827 (in Boie, 1827)	SAMA R36861
REFERENCES:
Ahl, E. 1930. Beiträge zur Lurch- und Kriechtierfauna Kwangsi's. Sitzungsberichte der Gesellschaft Naturforschender Freunde vom 1. April 1930 (privately published); Berlin: 310-332.
Amaral, A. 1924. Helminthophis. Proc. New England Zool. Club 9: 25-30.
Bechstein, J.M. 1802. Herrn de Lacépède's Naturgeschichte der Amphibien oder der eyerlegenden vierfüssigen Thiere und der Schlangen. Eine Fortsetzung von Buffon's Naturgeschichte aus dem Französischen übersetzt und mit Anmerkungen und Zusätzen versehen. Weimar: Industrie Comptoir.
Beddome, R.H. 1867. Descriptions and figures of five new snakes from the Madras Presidency. Madras Quart. J. Med. Sci. 11: 14-16.
Boie, F. 1827. Bemerkungen über Merrem's Versuch eines Systems der Amphibien, 1. Lieferung: Ophidier. Isis van Oken 20: 508-566.
Boulenger, G.A. 1891. Description of new oriental reptiles & batrachians. Ann. Mag. Nat. Hist. 6: 279-283.
Boulenger, G.A. 1896. Catalogue of the snakes in the British Museum, Vol. 3. Taylor & Francis, London.
Boulenger, G.A. 1897. An account of the reptiles and batrachians collected by Dr. L. Loria in British New Guinea. Annali del Museo Civico di Storia Naturale di Genova 18: 694-710.
Boulenger, G.A. 1913. Descriptions of new lizards in the collection of the British Museum. Ann. Mag. Nat. Hist. 12: 563-565.
Cope, E.D. 1861. On the Amphisbaenidae and Loxocemus. Proc. Acad. Nat. Sci. Philadelphia 1861: 75-77.
Cope, E.D. 1869a. [Protocol of the March 9, 1869 meeting]. Proc. Acad. Nat. Sci. Philadelphia 21: 5.
Cope, E.D. 1869b. On the reptilian orders Pythonomorpha and Streptosauria. Boston Soc. Nat. Hist. Proc. 12: 250-266.
Cope, E.D. 1879. Eleventh contribution to the herpetology of tropical America. Proc. Amer. Philos. Soc. 18: 261-277.
Cope, E.D. 1894. On the genera and species of Euchirotidae. American Naturalist 28: 436-437.
Duméril, A.M.C. & G. Bibron. 1837. Erpétologie Générale ou Histoire Naturelle Complete des Reptiles. Vol. 4. Libr. Encyclopédique Roret, Paris.
Duméril, A.M.C. & G. Bibron. 1839. Erpétologie Générale on Histoire Naturelle Complète des Reptiles. Vol.5. Roret/Fain et Thunot, Paris
Fischer, J.G. 1881. Beschreibung neuer Reptilien. Archiv für Naturgeschichte 47: 225-238.
Fischer, J.G. 1886. Herpetologische Notizen. Abh. Geb. Naturw. Hamb. 9: 51-67.
Gray, J.E. 1831. A synopsis of the species of Class Reptilia. In: Griffith, E & E. Pidgeon: The animal kingdom arranged in conformity with its organisation by the Baron Cuvier with additional descriptions of all the species hither named, and of many before noticed. Whittaker, Treacher and Co., London.
Gray, J.E. 1832. Illustrations of Indian Zoology: chiefly selected from the collection of Major General Hardwicke. Vol. 1, 1830-1835, London.
Gray, J.E. 1841. A catalogue of the species of reptiles and Amphibia hitherto described as inhabiting Australia, with a description of some new species from Western Australia. In: Journals of Two Expeditions of Discovery in North-West and Western Australia (G. Grey ed.), pp. 422-449, T. and W. Boone, London.
Gray, J.E. 1849. Catalogue of the specimens of snakes in the collection of the British Museum. Edward Newman, London.
Gray, J.E. 1852. Description of several new genera of reptiles, principally from the collection of H.M.S. Herald. Ann. Mag. Nat. Hist. 10: 437-440.
Gray, J.E. 1856. New genus of fish-scaled lizards (Scissosarae) from New Guinea. Ann. Mag. Nat. Hist. 18: 345-346.
Günther, A. 1858. Catalogue of Colubrine snakes of the British Museum. London, I - XVI, 1-281.
Günther, A. 1861. Second list of Siamese reptiles. Proc. Zool. Soc. London 1861: 187-189.
Günther, A. 1867. Additions to the knowledge of Australian reptiles and fishes. Ann. Mag. Nat. Hist. 20: 45-57.
Houttuyn, M. 1782. Het onderscheid der salamanderen van de haagdissen in 't algemeen, en van de gekkos in 't byzonder aangetoond. Venhandelingen Uitgegeven door het Zeeuwsch Genootschap der Wetenschappen te Vlissingen, ser. 1 , 9: 305-336.
Kluge, A.G. 1974. A taxonomic revision of the lizard family Pygopodidae. Miscellaneous Publications, Museum of Zoology, University of Michigan 147: 1-221.
Krefft, G. 1864. Descriptions of three new species of Australian snakes. Proc. Zool. Soc. London 1864: 180-182.
Krefft, G. 1869. The Snakes of Australia; an Illustrated and Descriptive Catalogue of All the Known Species. Govt. Printer, Sydney.
Jan, G. 1859. Plan d'une iconographie descriptive des ophidiens et description sommaire de nouvelles espèces de serpents. Rev. Mag. Zool., Paris 2: 122-130.
Jan, G. 1861. Iconographie générale des Ophidiens. Livraison. J.B. Bailière et Fils, Paris.
Jan, G. 1866. Notes sur les reptiles, les batraciens et les poissons recueillis pendant un voyage dans le Royaume de Siam. Nouv. Arch. Mus. nat. Hist.. Paris. 2: 4-20.
Lacépède, B.G.H. 1800. Sur un nouveau genre de serpent. Bull. Sc. Soc. Phil. Paris, 2: 169.
Laurenti, J.N. 1768. Specimen medicum, exhibens synopsin reptilium emendatam cum experimentis circa venena et antidota reptilium austracorum, quod authoritate et consensu. Joan. Thomae, Vienna.
Lichtenstein, M.H.C. 1823. Verzeichniss der Doubletten des zoologischen Museums der Königl. Universität zu Berlin nebst Beschreibung vieler bisher unbekannter Arten von Säugethieren, Vögeln, Amphibien und Fischen. Königl. Preuss. Akad. Wiss./ T. Trautwein, Berlin.
Linnaeus, C. 1758. Systema Naturæ per Regna Tria Naturæ, Secundum Classes, Ordines, Genera, Species, cum Characteribus, Differentiis, Synonymis, Locis. Tomus I. Editio decima, reformata. Laurentii Salvii, Holmiæ.
Linnaeus, C. 1766. Systema Naturæ per Regna Tria Naturæ, Secundum Classes, Ordines, Genera, Species, cum Characteribus, Differentiis, Synonymis, Locis. Tomus I. Editio duodecima, reformata. Laurentii Salvii, Stockholm, Holmiae
Lucas, A.H.S. & C. Frost. 1895. Preliminary notice of certain new species of lizards from central Australia. Proc. R Soc. Victoria 7: 264-269.
Macleay, W. 1877. The lizards of the Chevert Expedition. Proceedings of the Linnean Society of New South Wales, 2: 60-69; 97-104.
Macleay, W. 1882. Description of two new species of snakes. Proc. Linn. Soc. New South Wales, Sydney 6: 811-813.
McDowell, S.B. 1979. A catalogue of the snakes of New Guinea and the Solomons, with special reference to those in the Bernice P. Bishop Museum. Part 3. Boinae and Acrochordoidea (Reptilia, Serpentes). Journal of Herpetology 13: 105-111.
Peters, W.C.H. 1858. Über die Typhlopinen oder blödsichtigen Schlangen und Über neue dahin gehörige Arten. Monatsberichte der königlichen Akademie der Wissenschaften zu Berlin 1857 (November): 508-509.
Peters, W.C.H. 1861. Eine zweite Übersicht (vergl. Monatsberichte 1859 p. 269) der von Hrn. F. Jagor auf Malacca, Java, Borneo und den Philippinen gesammelten und dem Kgl. zoologischen Museum übersandten Schlangen. Monatsber. königl. Akad. Wiss. Berlin 1861: 683-691.
Peters, W.C.H. 1863. Eine Übersicht der von Hrn. Richard Schomburgk an das zoologische Museum eingesandten Amphibien, aus Buchsfelde bei Adelaide in Südaustralien. Monatsber. königl. Akad. Wiss. Berlin. 1863: 228-236.
Reuss, A. 1834. Zoologische Miscellen, Reptilien. Saurier. Batrachier. Museum Senckenbergianum, Frankfurt am Main 1: 27-62.
Roux, J. 1910. Reptilien und Amphibien der Aru- und Kei-Inseln. Abh. Senckenb. Naturf. Ges. (Frankfurt) 33: 211-247.
Schlegel, H. 1837. Essai sur la physionomie des serpens. Partie Générale. La Haye.
Schlegel, H. 1851. Description d’une nouvelle espèce du genre Eryx, Eryx reinhardtii. Bijdragen tot de Dierkunde 3: 1-3.
Schlegel, H. 1872. De direntium van het Koninklijk zoologisch Genootschap Natura Artis Magistra te Amsterdam, Reptilia. Amsterdam.
Schneider, J.G. 1799. Historiae Amphibiorum narturalis et literariae. Fasciculus primus, continens Ranas. Calamitas, Bufones, Salamandras et Hydros. Frommanni, Jena
Schneider, J.G. 1801. Historiae Amphibiorum naturalis et literariae. Fasciculus secundus continens Crocodilos, Scincos, Chamaesauras, Boas, Pseudoboas, Elapes, Angues, Amphisbaenas et Caecilias. Frommanni, Jena.
Shaw, G., and E. Nodder. 1802. The Naturalist's Miscellany, or Coloured Figures of Natural Objects. Nodder & Co., London.
Smith, M.A. 1931. Description of a new genus of sea snake from the coast of Australia, with a note on the structure providing for complete closure of the mouth in aquatic snakes. Proc. Zool. Soc. London 1931: 397-398.
Smith, M.A. 1940. A new snake of the genus Anomochilus from the Malay Peninsula. Ann. Mag. Nat. Hist. 35: 447-449.
Tschudi, J.J. 1837. Neues Genus von Wasserschlangen. Archiv für Naturgeschichte 3: 331-335.
Wagler, J. 1824. Serpentum Brasiliensium species novae, ou histoire naturelle des espèces nouvelles de serpens. In: Jean de Spix, Animalia nova sive species novae. Typis Franc. Seraph. Hübschmanni, Monaco.
Waite, E.R. 1897. A new blind snake from the Duke of York Island. Rec. Austral. Mus. 3: 69-70
Wells, R.W. & C.R. Wellington 1985. A classification of the Amphibia and Reptilia of Australia. Australian Journal of Herpetology, Supplementary Series 1: 1-61.
Woodward, A.S. 1901. On some extinct reptiles from Patagonia of the genera Miolania, Dinilysia and Genyodectes. Proc. Zool. Soc. Lond. 1901: 169-184.
Yi, H., and M. Norell. 2015. The burrowing origin of modern snakes. Science Advances 2015:e1500743.
INSTITUTIONAL ABBREVIATIONS:
AMNH: American Museum of Natural History, New York, New York, USA.
CAS: California Academy of Sciences, San Francisco, California, USA.
FMNH: Field Museum of Natural History, Chicago, Illinois, USA.
FRIM: Forest Research Institute Malaysia, Kepong, Malaysia.
MACN: Museo Argentino de Ciencias Naturales "Bernardino Rivadavia", Buenos Aires, Argentina.
NTM: Museum and Art Gallery of the Northern Territory, Darwin, Northern Territory, Australia.
SAMA: South Australian Museum, Adelaide, South Australia, Australia.
THNC: Texas Memorial Museum at the University of Texas, Austin, Texas, USA.
WAM: Western Australian Museum, Perth, Western Australia, Australia.
